# Supplementary material
Source: MDPI journal article supplement (https://www.mdpi.com/2073-8994/14/12/2506)
Supplement: s1 [file s1]

# Surface characterization of modified electrodes based on 4-(azulen-1-yl)-2,6-bis((E)-2-(thiophen-2-yl)vinyl)pyridine

Irinela Chilibon<sup>1</sup>, Adina-Maria Păun<sup>2</sup>, Cristina Vasiliu<sup>1</sup>, Elena Diacu<sup>2</sup>, Raluca Isopescu<sup>2</sup> and Eleonora-Mihaela Ungureanu<sup>2,\*</sup>

Basic properties for **M** and characterization by elemental analysis, UV-Vis, IR, <sup>1</sup>H NMR, <sup>13</sup>C-NMR, MS

Blue crystals, m.p. 144 °C; [Found: C, 76.91; H, 4.56; N, 3.31; C<sub>27</sub>H<sub>19</sub>NS<sub>2</sub> requires C, 76.92; H, 4.54; N, 3.32%]; R<sub>f</sub> (20% DCM/C<sub>6</sub>) 0.34; UV-Vis (MeOH) 699sh (1.71), 631sh (2.27), 580 (2.38), 374 (4.44), 324 (4.63), 282 (4.50), 225 (4.32), 216 (4.34) nm; ν<sub>max</sub> (neat) 3101, 3060, 2954, 2918, 2851, 2158, 1988, 1708, 1622, 1588s, 1575, 1523, 1392, 1355, 1289, 1239, 1176, 956, 882, 855, 838, 815, 768, 743, 681, 667, 573, 560, 489 cm<sup>-1</sup>; δ<sub>H</sub> (500 MHz CDCl<sub>3</sub>) 8.66 (1 H, d, J 9.8 Hz, 8'-H), 8.42 (1 H, d, J 9.4 Hz, 4'-H), 8.10 (1 H, d, J 3.9 Hz, 2'-H), 7.97 (2 H, d, J = 15.7 Hz, 2'''-H), 7.69 (1 H, t, J 9.8 Hz, 6'-H), 7.48 (1 H, d, J 3.9 Hz, 3'-H), 7.42 (2 H, s, 3-H, 5-H), 7.30 (1 H, t, J 9.9 Hz, 7'-H), 7.27 (2 H, d, J 5.0 Hz, 5''-H), 7.26 (1 H, t, J 9.4 Hz, 5'-H), 7.24 (2 H, d, J 3.5 Hz, 3''-H), 7.11 (2 H, d, J 15.6 Hz, 1'''-H), 7.06 (2 H, dd, <sup>3</sup>J = 3.6, 5.0 Hz, 4''-H); δ<sub>C</sub> (125 MHz CDCl<sub>3</sub>) 155.0 (C2, C6), 146.2 (C4), 142.6 (C3a'), 142.3 (C2''), 138.7 (C6'), 137.8 (C4'), 137.0 (C2'), 135.9 (C8a'), 135.3 (C8'), 127.8 (C3'', C4'', C5'', C2'''), 126.0 (C1'), 125.5 (1'''-H), 124.5 (C7'), 124.2 (C5'), 121.2 (C3, C5), 118.1 (C3'); MS-ESI (m/z) 422 [M<sup>+</sup> + 1].

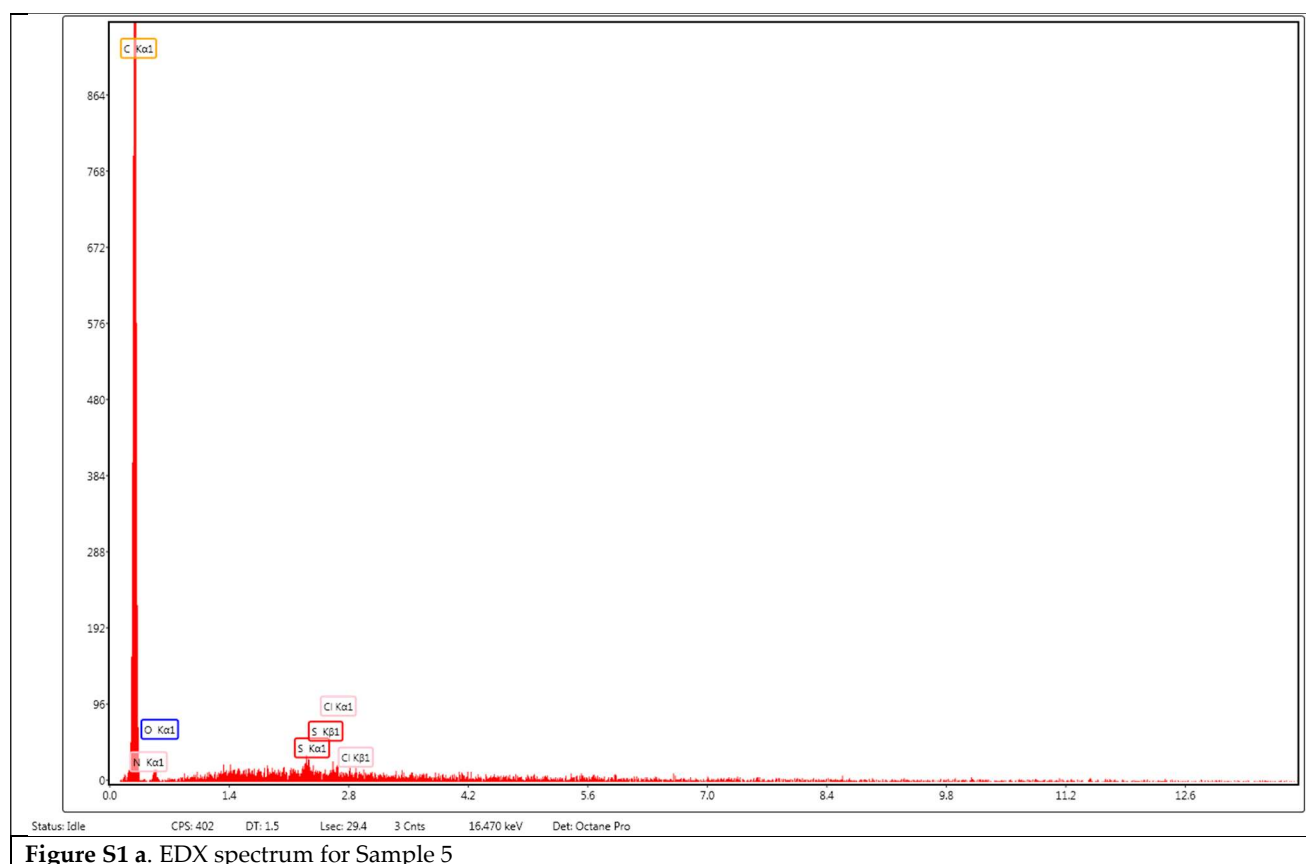

**Figure S1 a.** EDX spectrum for Sample 5

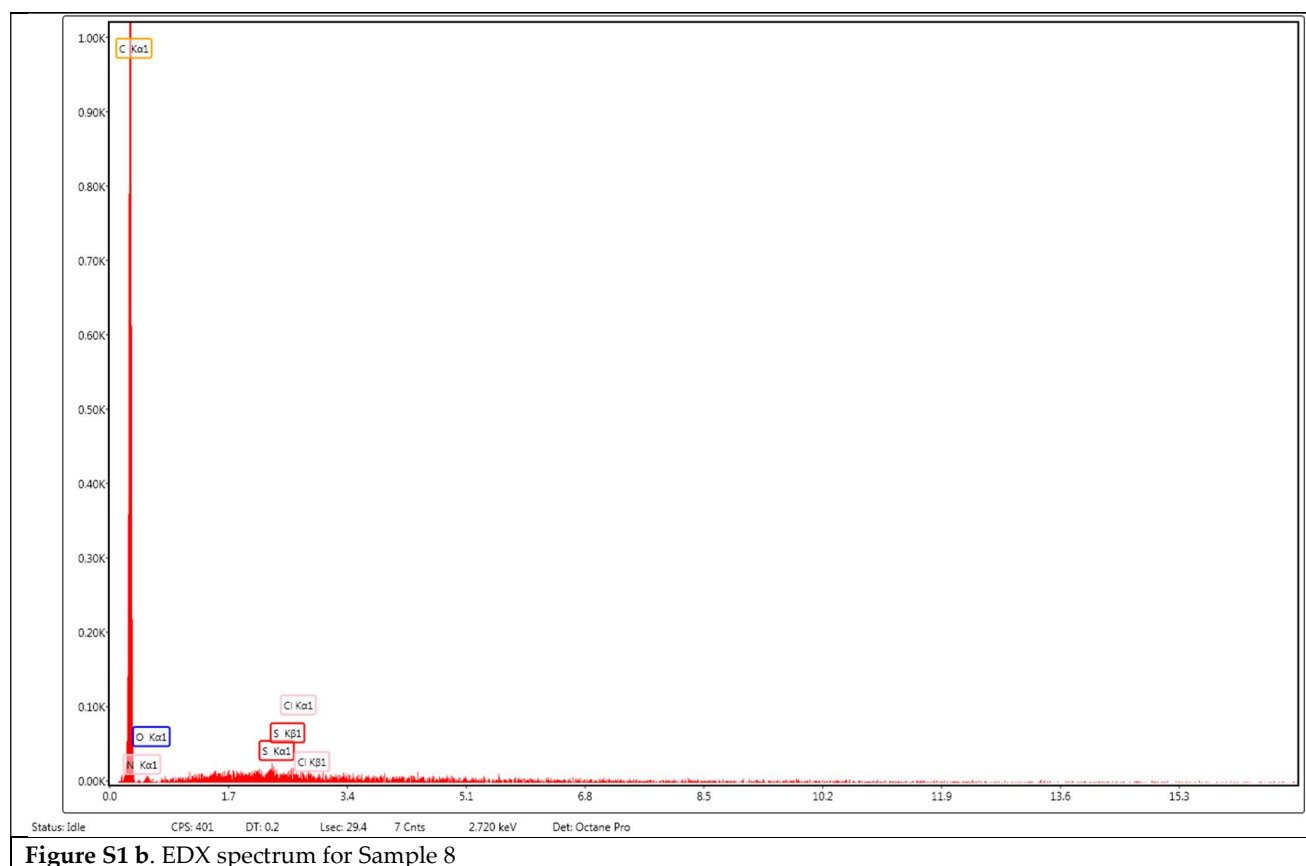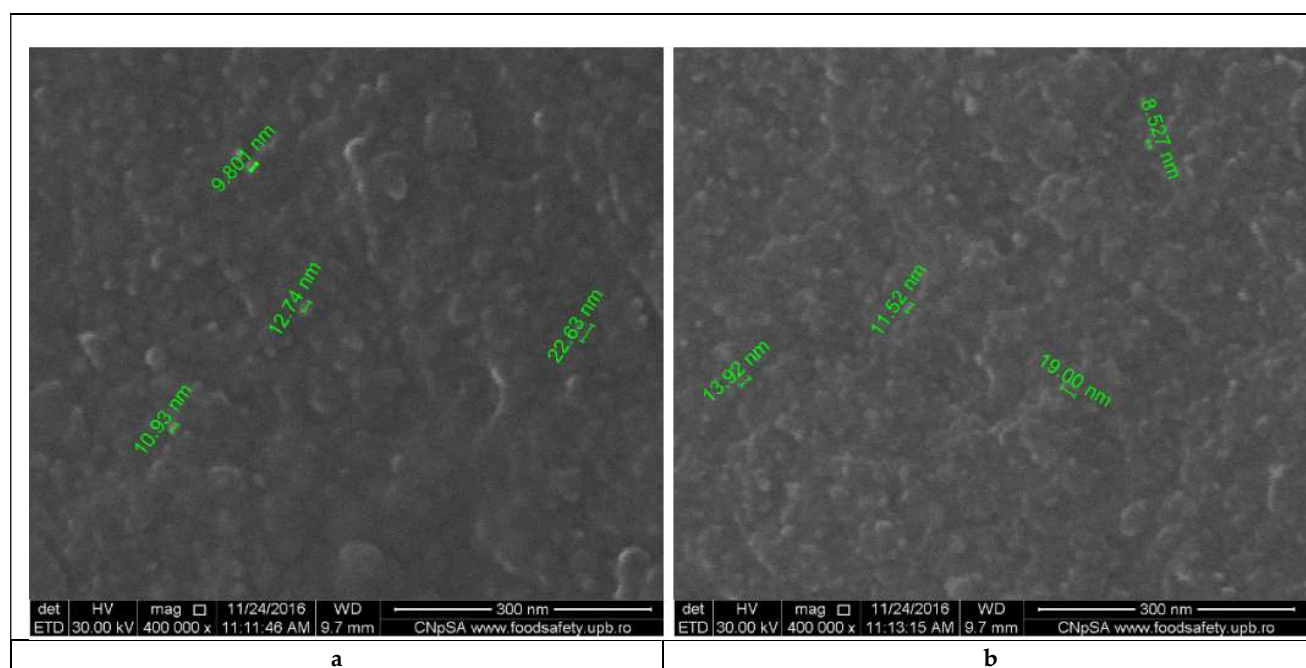

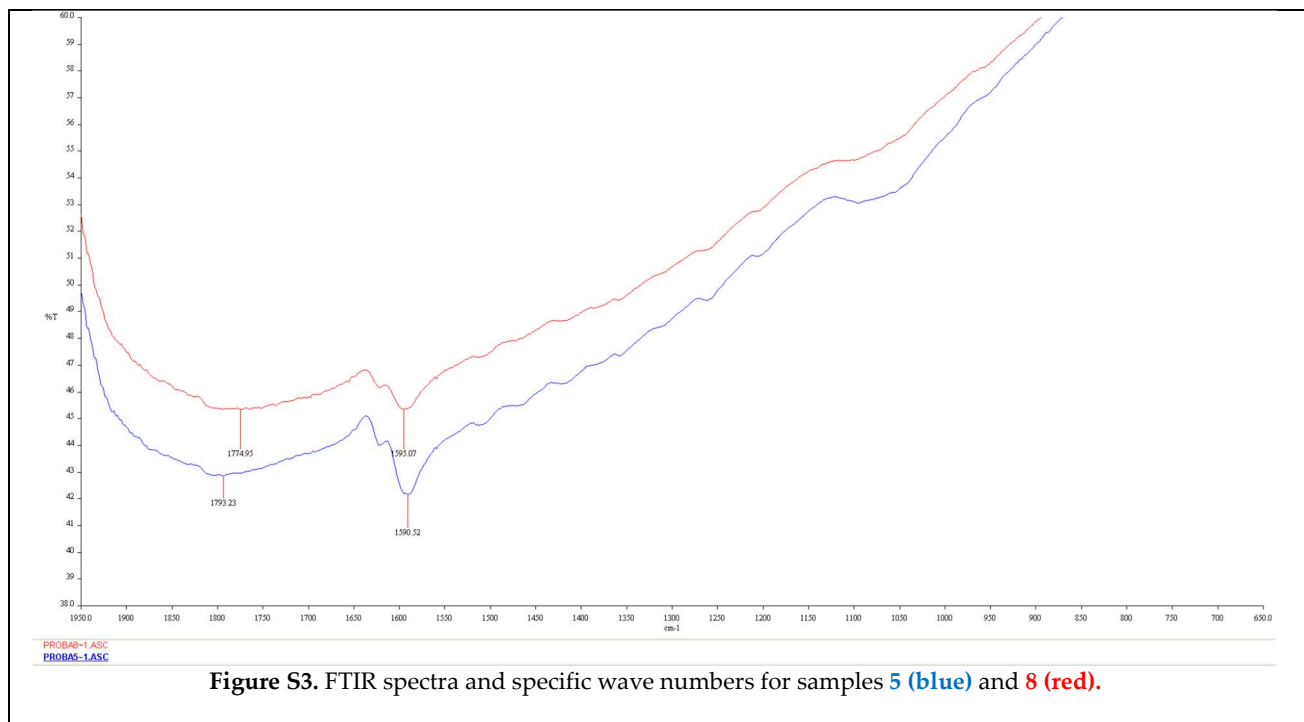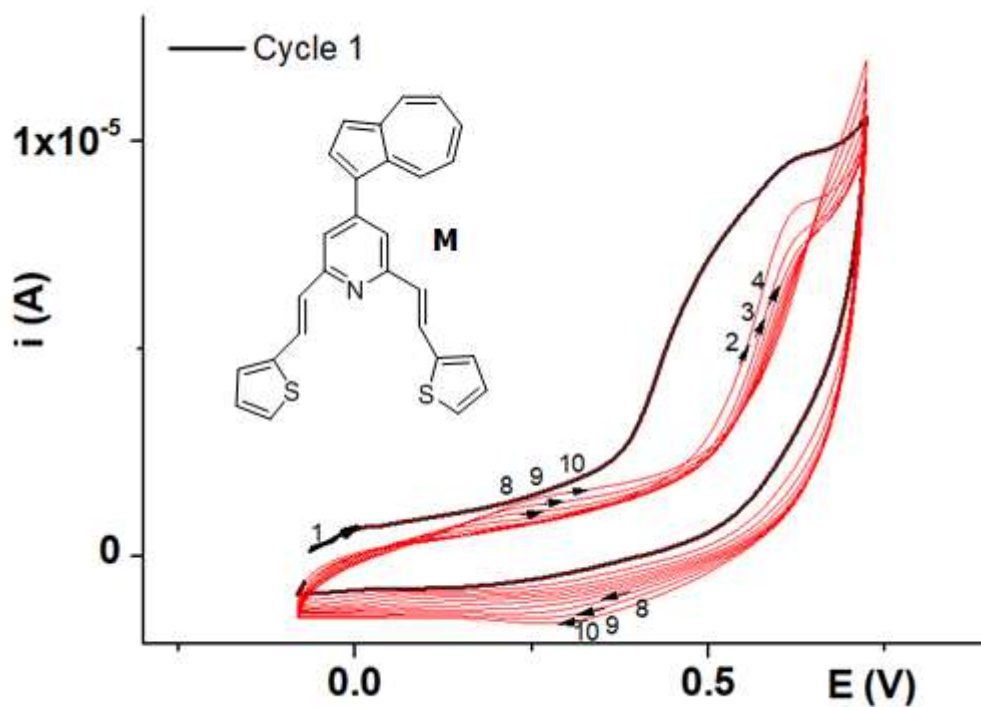

**Figure S4.** CV curves during the preparation of CMEs by scanning in the potential range of the first anodic peak a1 (short anodic range potential);  $[M] = 0.63 \text{ mM}$ .

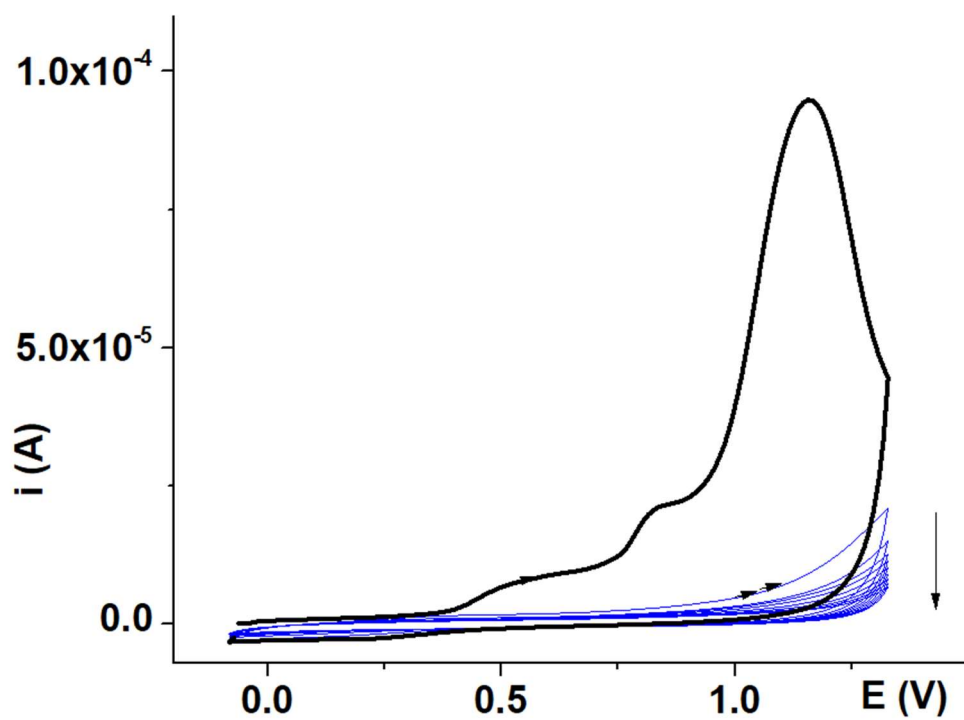

**Figure S5.** CV curves during the preparation of CMEs by scanning on larger anodic range of potential;  $[M] = 0.63$  mM.

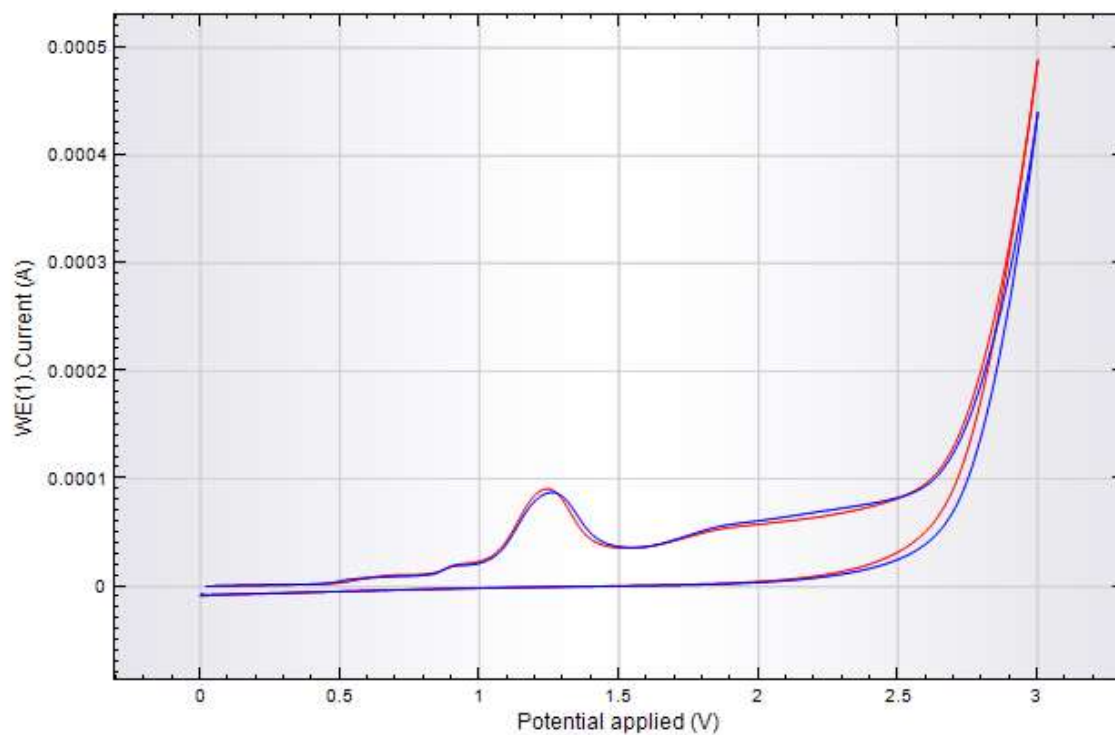

**Figure S6.** CV curves ( $0.1$  V/s) for  $[M] = 0.63$  mM recorded successively on glassy carbon electrode (3 mm diameter).

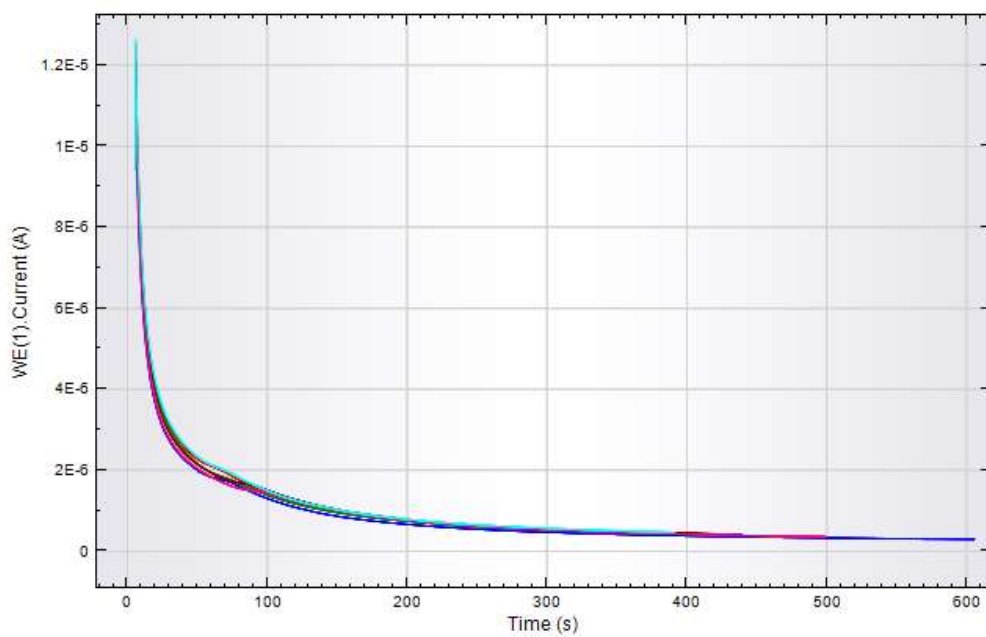

**Figure S7.** 6 successive chronoamperograms during CPE at 1.2 V (0.5 mC) in solution of  $[M] = 0.63$  mM in 0.1 M TBAP,  $\text{CH}_3\text{CN}$  registered in the same day at different moments of preparation.

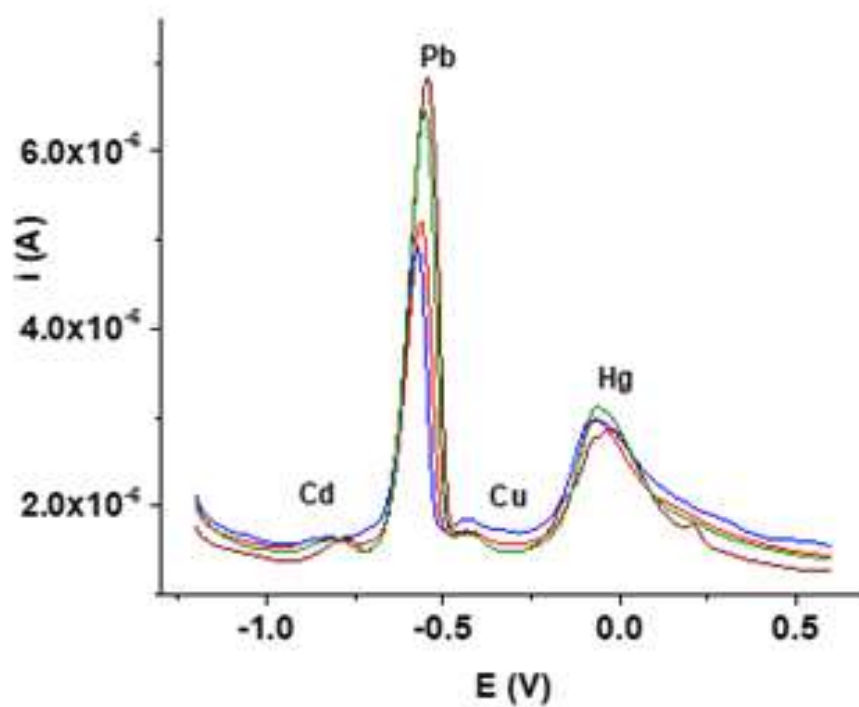

**Figure S8.** Stripping DPV curves for CME prepared by CPE at 1.2 V (0.5 mC) in a solution of  $[M] = 0.63$  mM in 0.1 M TBAP,  $\text{CH}_3\text{CN}$  and introduced in accumulation solutions of different concentrations:  $10^{-5}$  M (blue and red),  $10^{-6}$  M (olive and wine).
